# Supplementary material for: Impact of solar versus volcanic activity variations on tropospheric temperatures and precipitation during the Dalton Minimum
Source: Copernicus journal article supplement (doi:10.5194/cp-10-921-2014), 2014-05-09
Supplement: Supplementary file 3 [file cp-10-921-2014-supplement.zip]

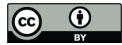

## *Supplement of*

# **Impact of solar versus volcanic activity variations on tropospheric temperatures and precipitation during the Dalton Minimum**

**J. G. Anet et al.**

*Correspondence to:* J. G. Anet ([julien.anet@alumni.ethz.ch](mailto:julien.anet@alumni.ethz.ch))

- Supplement-Cover-Letter.pdf
- S1T.pdf
- S2T.pdf
- S3T.pdf
- S4T.pdf
- S5T.pdf
- S6T.pdf
- readme.txt
