# Supplementary figures and images for: Impact of solar versus volcanic activity variations on tropospheric temperatures and precipitation during the Dalton Minimum
Source: Copernicus journal article supplement (doi:10.5194/cp-10-921-2014), 2014-05-09

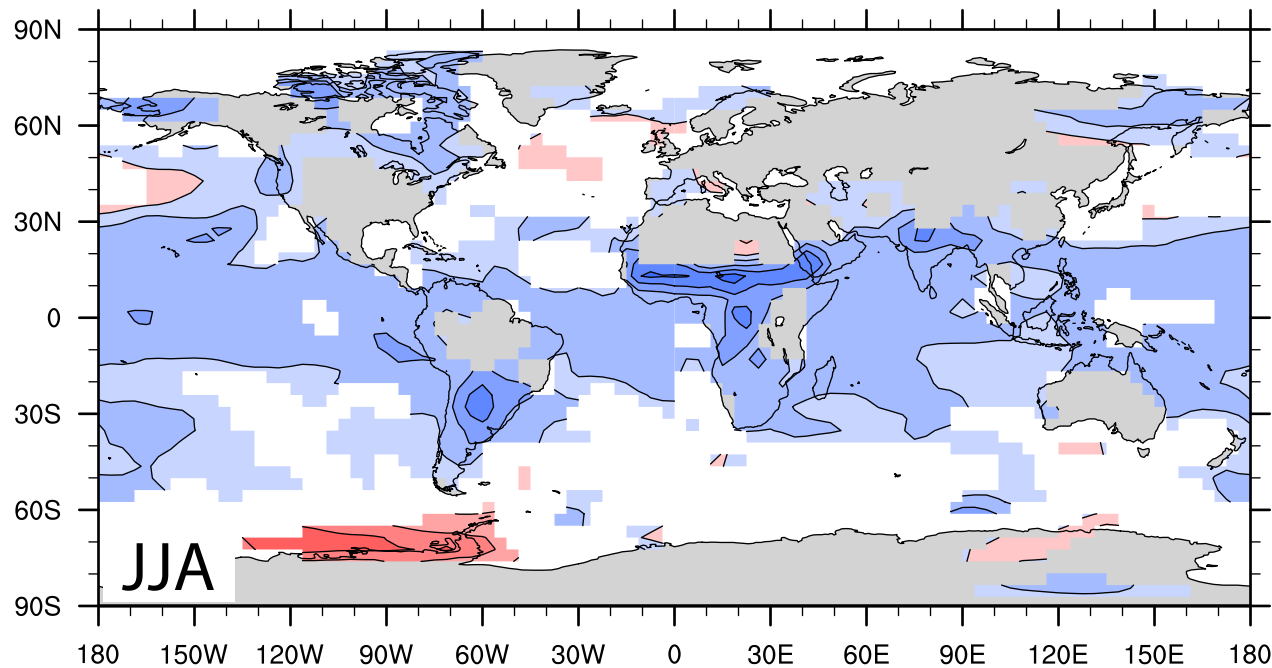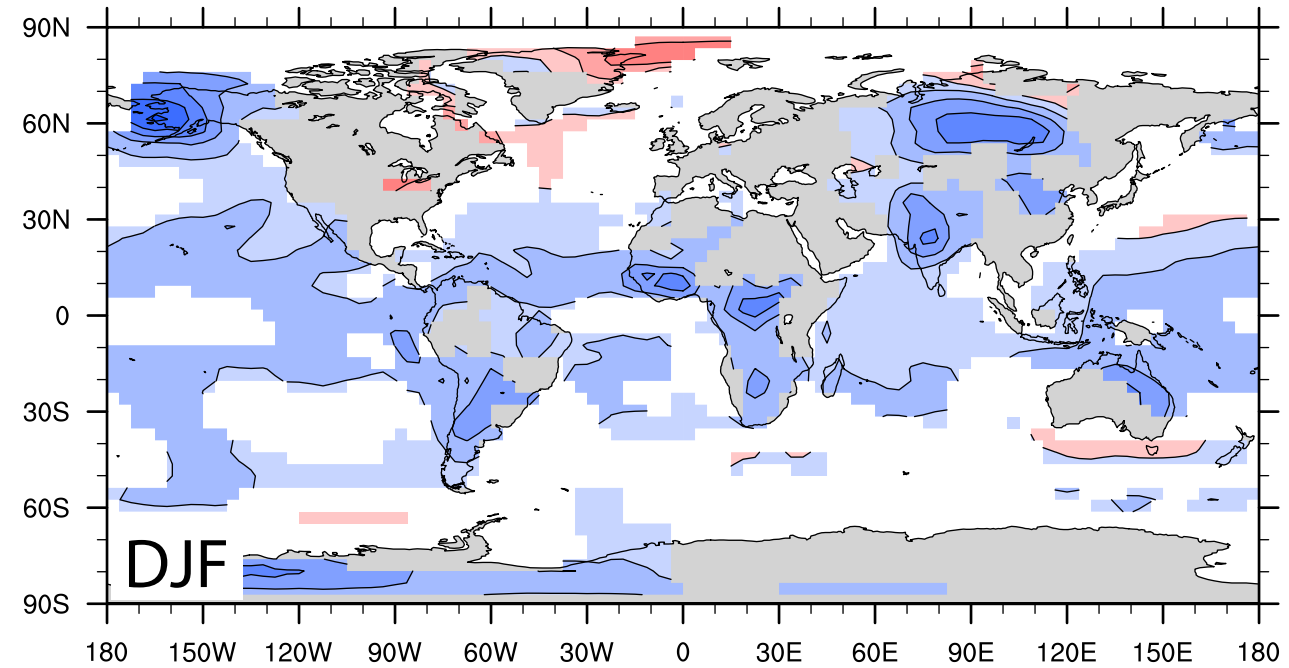

Kelvin

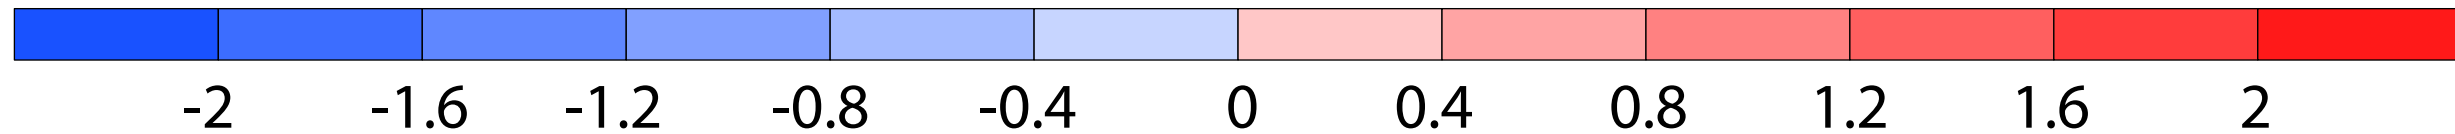

Supplement: Supplementary file 1 [file cp-10-921-2014-supplement.zip]

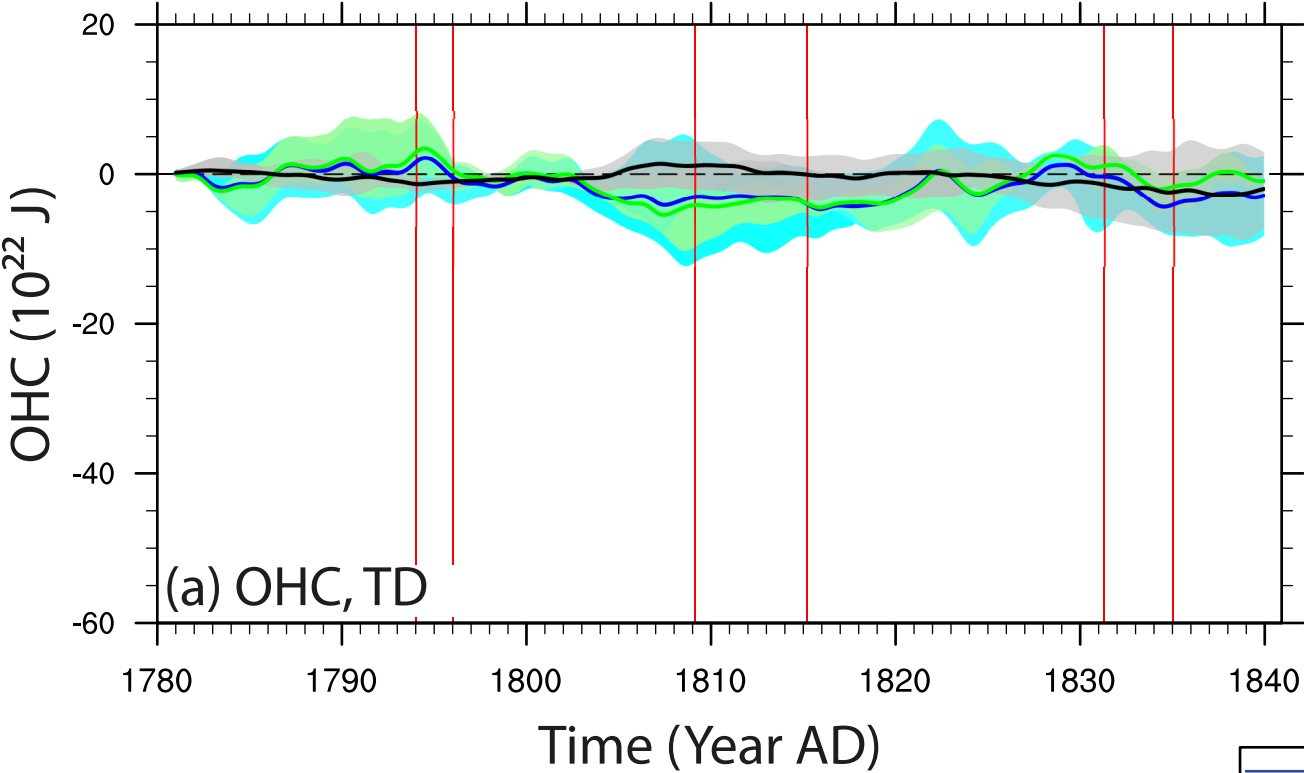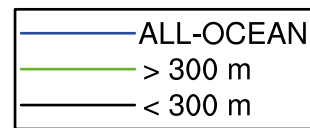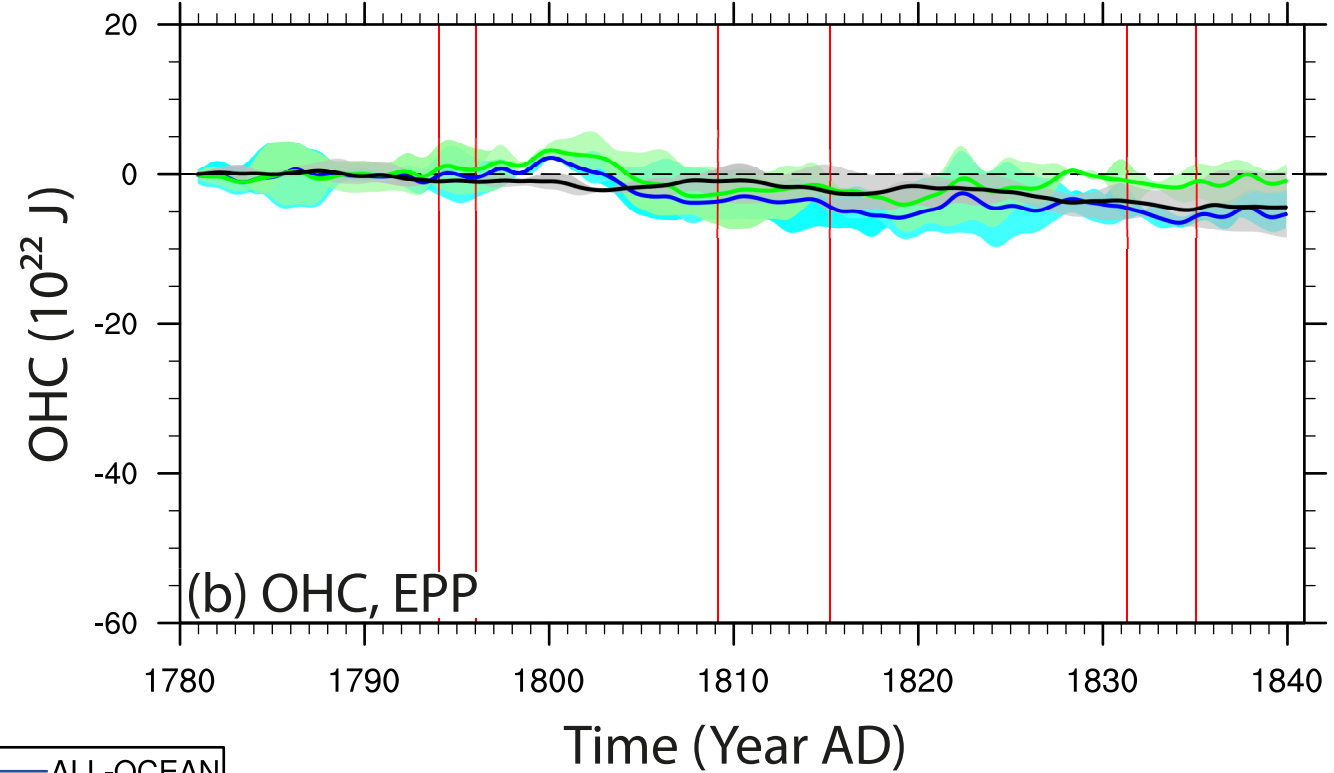

Supplement: Supplementary file 2 [file cp-10-921-2014-supplement.zip]

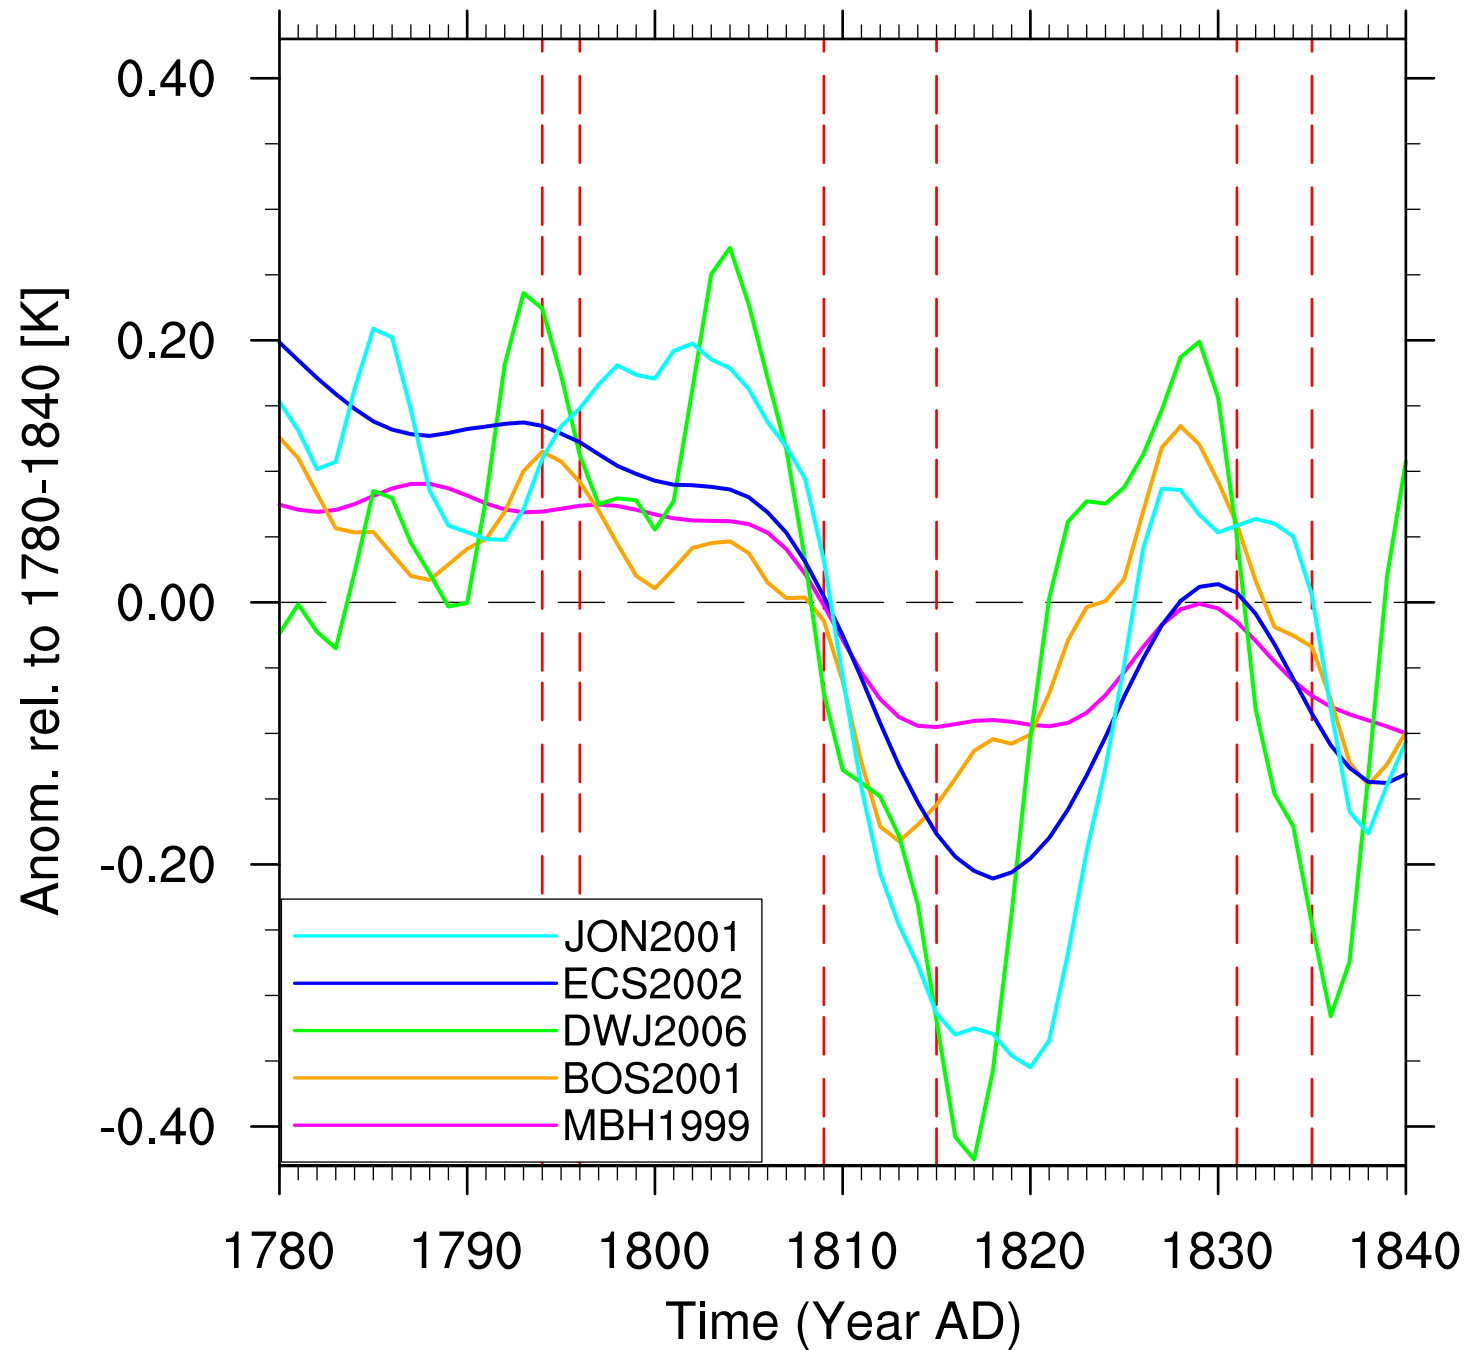

Supplement: Supplementary file 4 [file cp-10-921-2014-supplement.zip]

# AMOC Index, MAX(28N->90N) below 300m

Sverdrup

$10^6 \text{ m}^3/\text{s}$

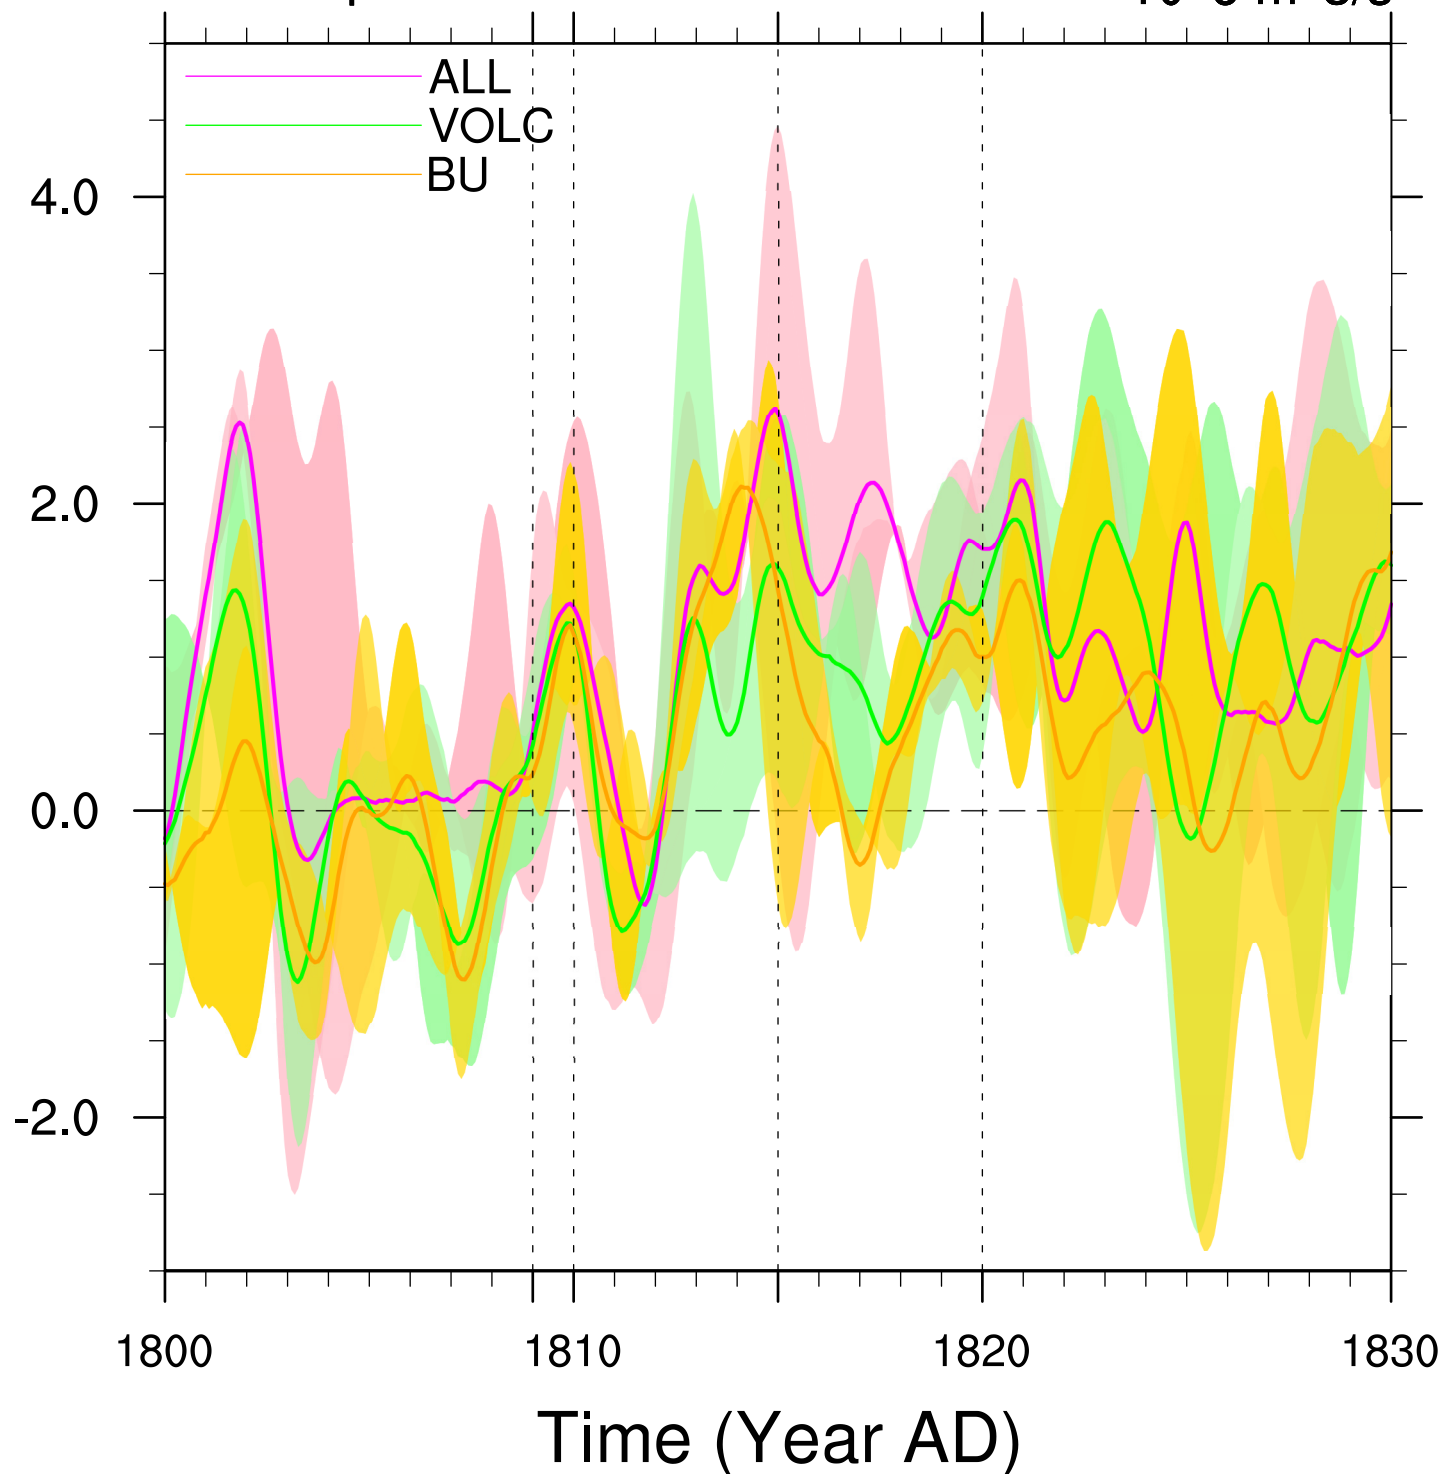

Supplement: Supplementary file 5 [file cp-10-921-2014-supplement.zip]

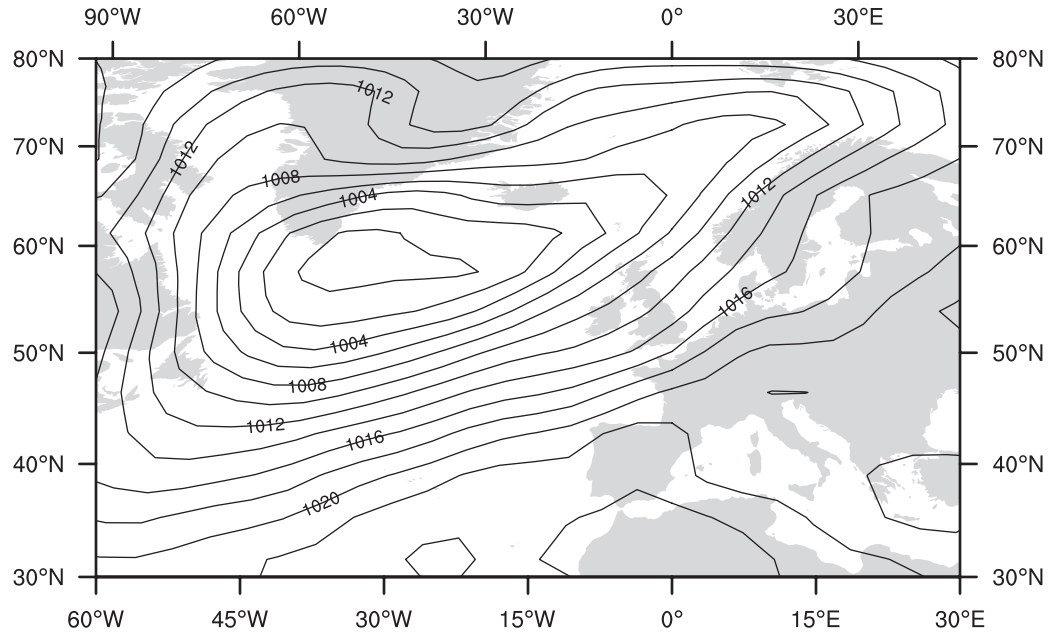

Supplement: Supplementary file 6 [file cp-10-921-2014-supplement.zip]

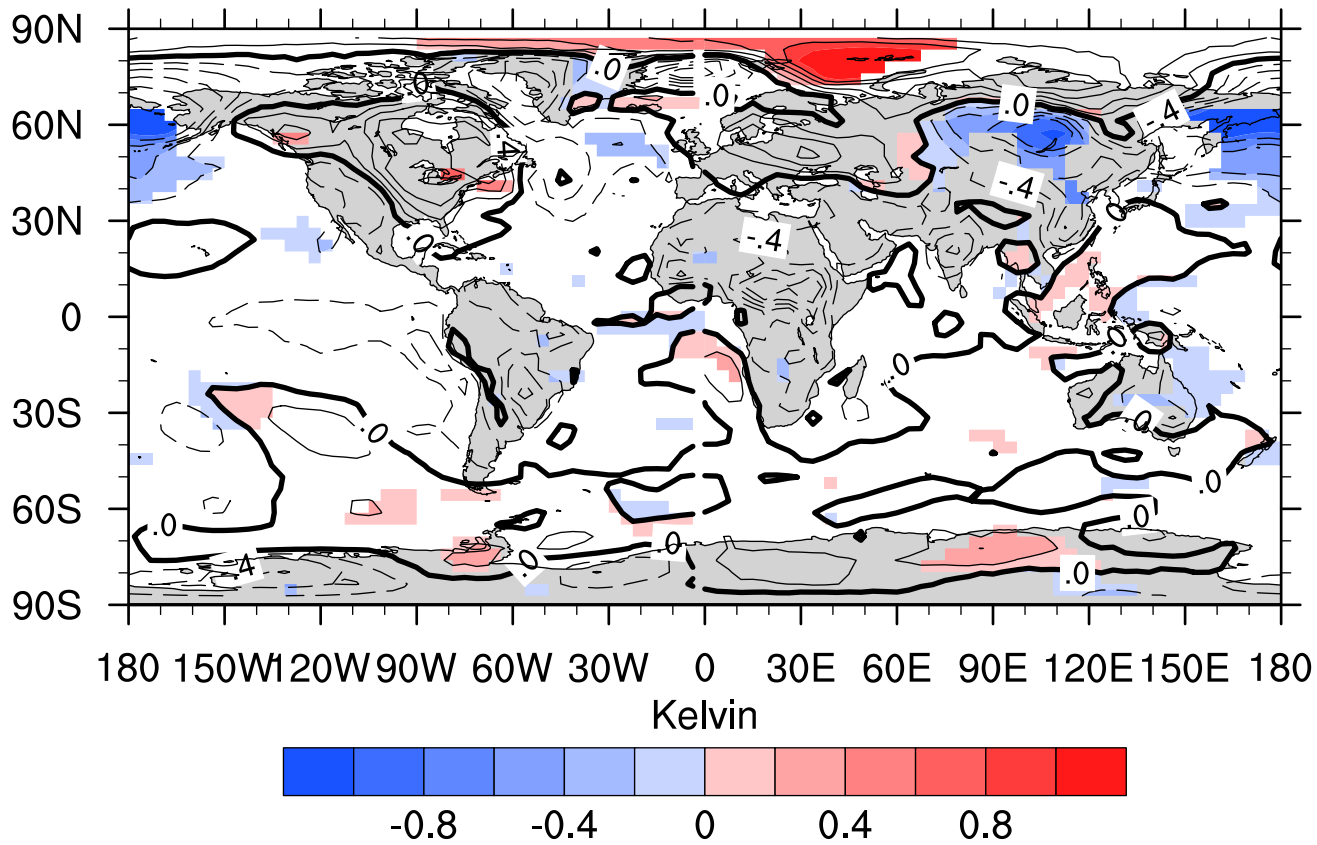

Supplement: Supplementary file 7 [file cp-10-921-2014-supplement.zip]
